# Supplementary material for: Benchmarking Clinical Speech Recognition and Information Extraction: New Data, Methods, and Evaluations
Source: PubMed Central journal article supplement (PMC4427705; doi:10.2196/medinform.4321), 2015-04-27
Supplement: medinform_v3i2e19_app1.pdf [file medinform_v3i2e19_app1.pdf]

## For Methods

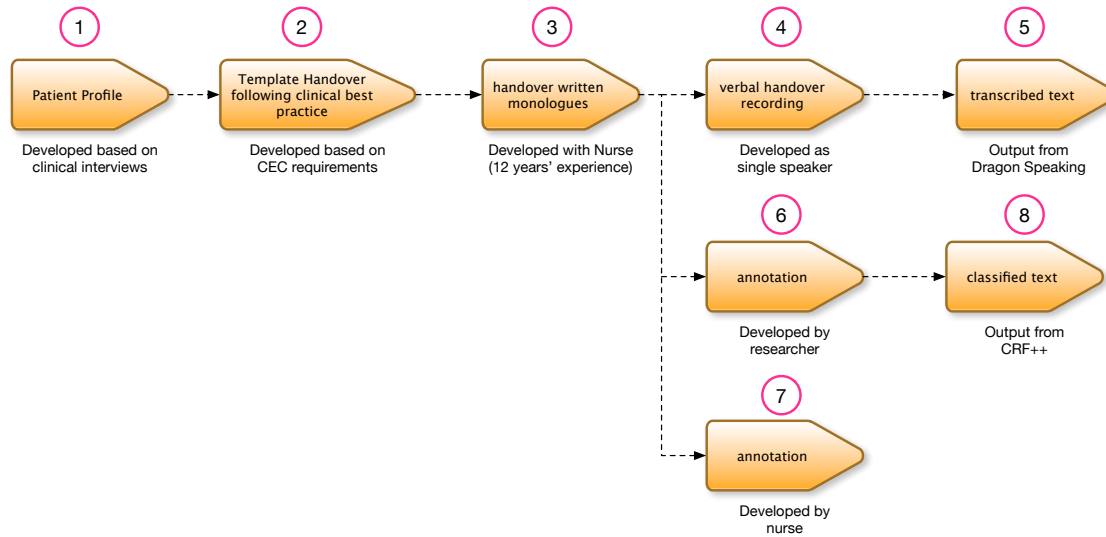

A workflow architecture that consisted of eight steps. Patient profiles (summaries) were created based on experience and clinical interviews (1). A template handover outline was created (2) matching best practice; A handover event, comprising the text of a nurse speaking to a virtual colleague was created through a creating writing exercise (3) and recorded using a personal microphone (4) to simulate inward acoustics. The audio file was passed through a commercial speech-to-text analysis engine (5) to evaluate SR errors. Separately, the original text (3) was annotated by a practicing nurse (6) to highlight the components of the text that matched the hospital pro-forma and re-annotated by an informatics researcher (7) to evaluate inter-annotator disagreement. The annotated text (6) was used to train an open-source classifier (8) to automatically generate pre-filled handover forms.

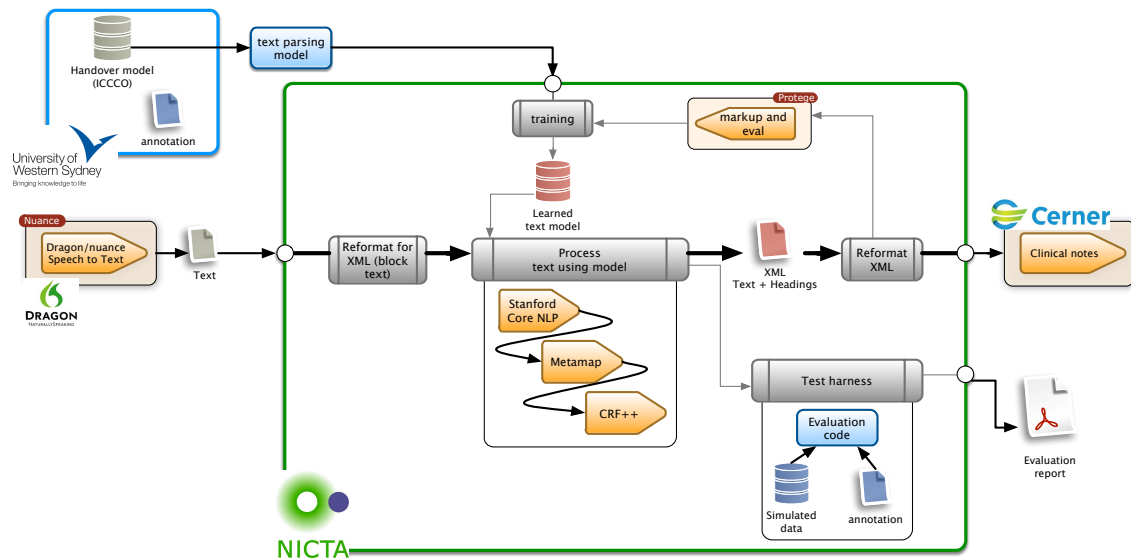

Application of clinical dataset for classified pre-filled nursing handover documentation. Corporate references describe its interconnections in a health information system. The entire section denoted by the green rectangle will be provided as open source software and the data described here may be used for training and evaluation of the system.

|                                              |                       |  |
|----------------------------------------------|-----------------------|--|
| <b>HANDOVER NURSE</b>                        |                       |  |
| Title                                        |                       |  |
| Given names/ initials                        |                       |  |
| Last name                                    |                       |  |
| Allocated rooms                              |                       |  |
| Allocated beds                               |                       |  |
| <b>PATIENT INTRODUCTION</b>                  |                       |  |
| Title                                        |                       |  |
| Given names/ initials                        |                       |  |
| Last name                                    |                       |  |
| IDnumber                                     |                       |  |
| Date of birth                                | DOB year              |  |
|                                              | DOB month             |  |
|                                              | DOB day               |  |
| Age in years                                 |                       |  |
| Gender                                       |                       |  |
| Current room                                 |                       |  |
| Current bed                                  |                       |  |
| Under Dr                                     | Given names/ initials |  |
|                                              | Last name             |  |
| Admission reason/ diagnosis                  |                       |  |
| Allergy                                      |                       |  |
| Chronic condition                            |                       |  |
| Disease/ problem history                     |                       |  |
| Care plan                                    |                       |  |
| <b>MY SHIFT</b>                              |                       |  |
| Status                                       |                       |  |
| Contraction                                  |                       |  |
| Input/ diet                                  |                       |  |
| Output/ diuresis/ bowel movement             |                       |  |
| Wounds/ skin                                 |                       |  |
| Activities of daily living                   |                       |  |
| Risk management                              |                       |  |
| Other observation                            |                       |  |
| <b>APPOINTMENTS</b>                          |                       |  |
| Status                                       |                       |  |
| Description                                  |                       |  |
| Clinician                                    | Title                 |  |
|                                              | Given names/ initials |  |
|                                              | Last name             |  |
| Date and time                                | Year                  |  |
|                                              | Month                 |  |
|                                              | Day                   |  |
|                                              | Time                  |  |
| Place                                        | City                  |  |
|                                              | Hospital              |  |
|                                              | Ward                  |  |
| <b>MEDICATION</b>                            |                       |  |
| Medicine                                     |                       |  |
| Dosage                                       |                       |  |
| Status                                       |                       |  |
| <b>FUTURE CARE</b>                           |                       |  |
| Alert/ warning/ abnormal result              |                       |  |
| Goal/ task to be completed/ expected outcome |                       |  |
| Discharge/ transfer plan                     |                       |  |

The handover form that was developed for this study.

Olympus WS-760M  
200 AUD

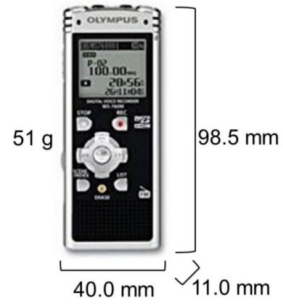

Olympus ME52W  
15 AUD  
lapel, noise cancelling

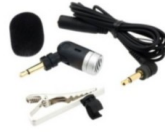

4 g (25 mm) when plugged directly  
15 g with the cable and clip

The recorder and microphone that were used in our data collection.



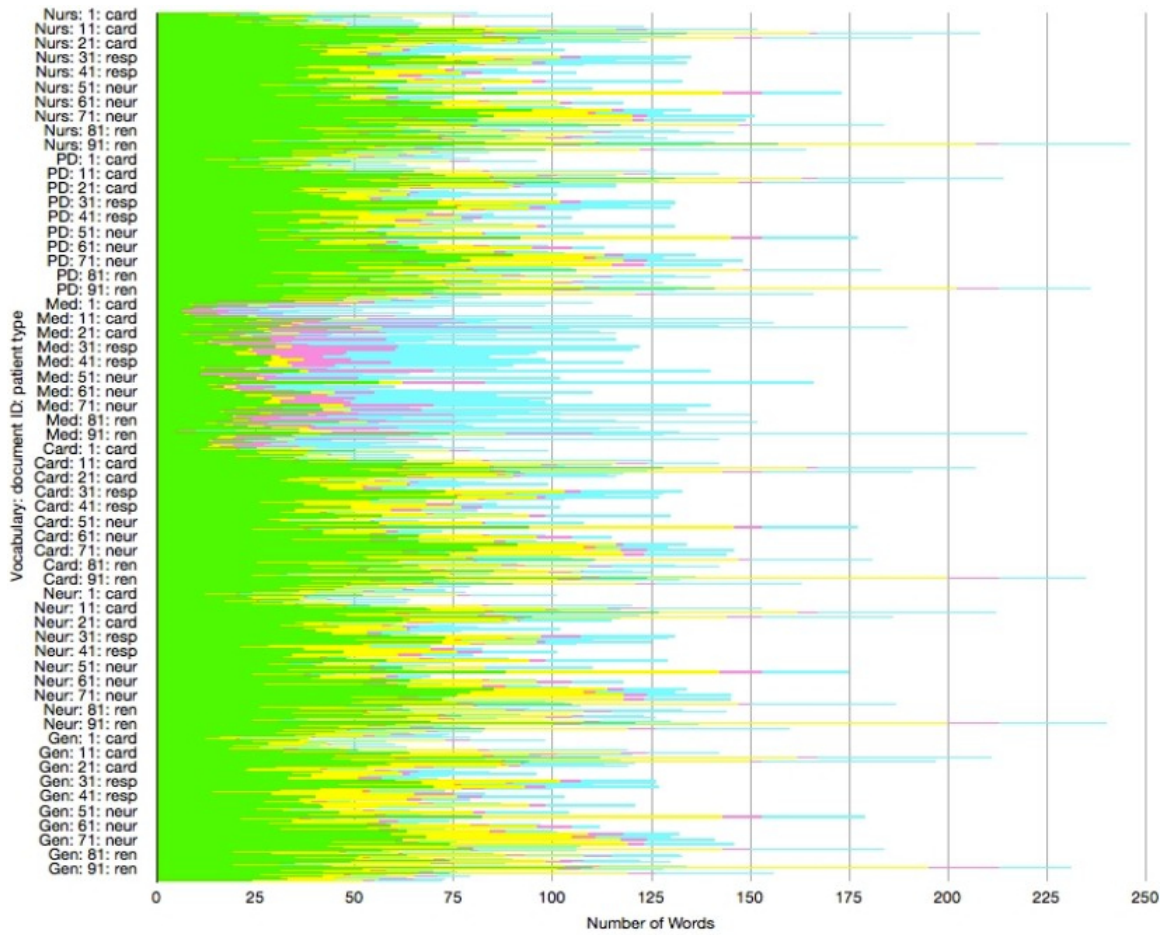

Speech recognition performance with the vocabularies of general (Gen), medical (Med), nursing (Nurs), cardiology (Card), neurology (Neur), and pulmonary disease (PD) illustrated separately for each document.

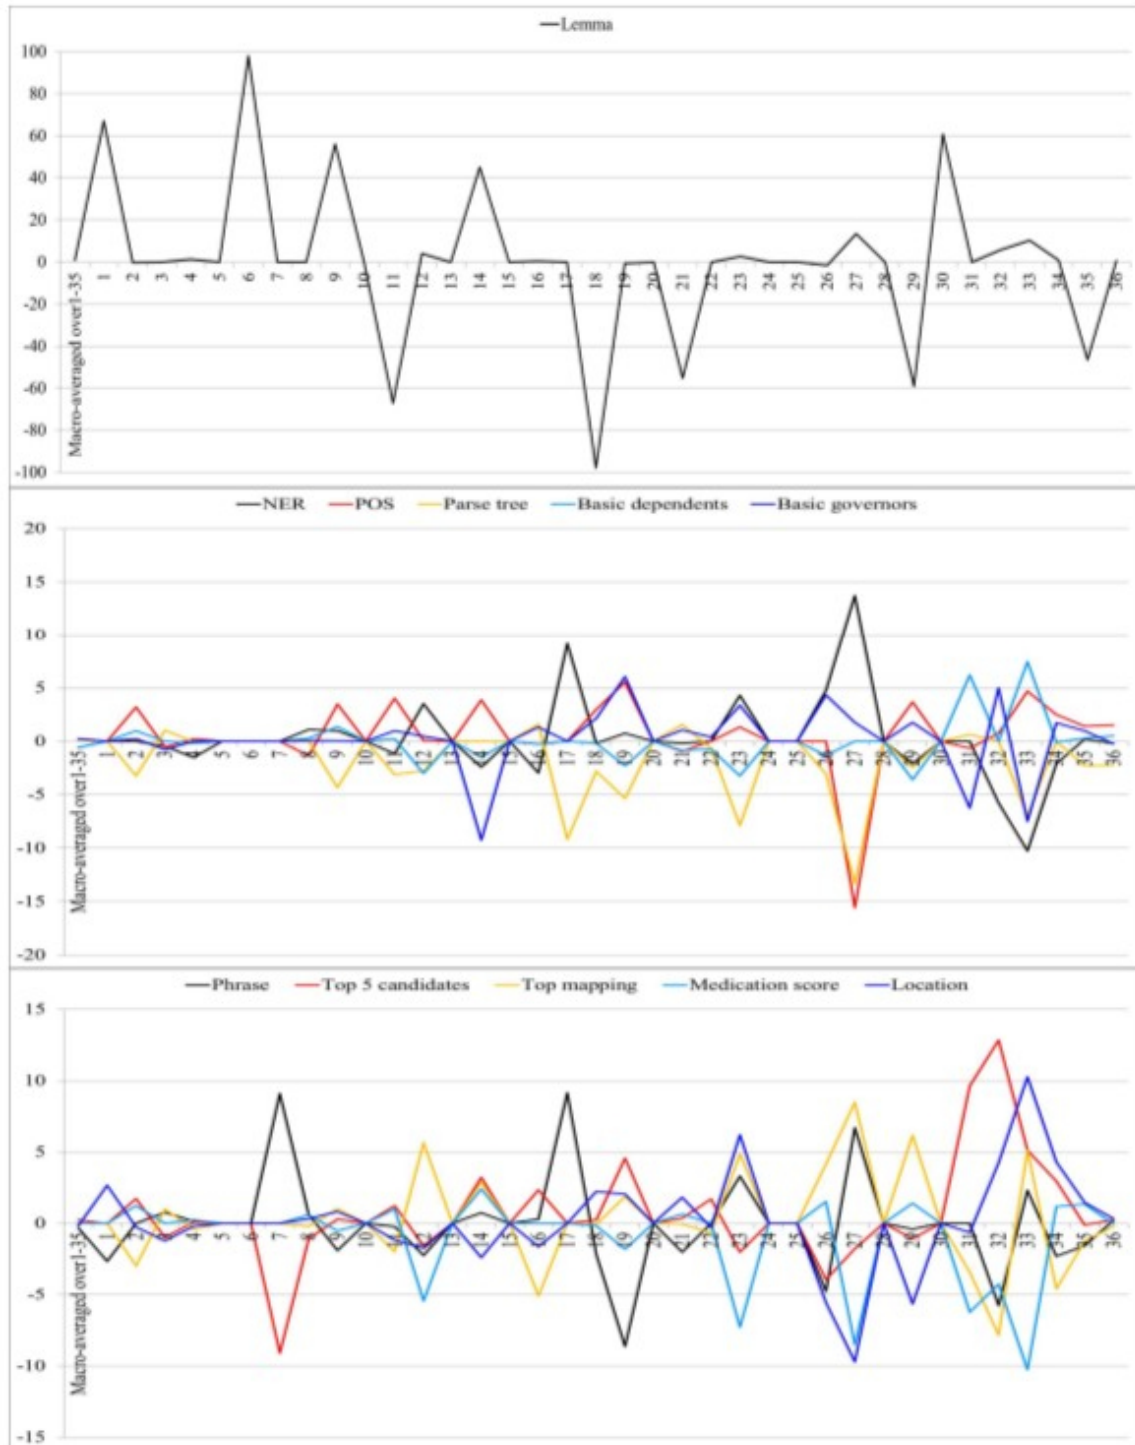

Contribution of each feature type to our best system. We measured the decrease in the F1 percentage between the system with all feature types (i.e., the best system) and a system without each feature type in turn is measured using LOO CV. The category numbering corresponds to Figure 2 of the Paper.



## Speech-to-Text and Information Extraction for Nursing Records

### *Guidelines for Creating Showcase Data*

**Author:** Hanna Suominen, NICTA

**Date:** 30 Jan 2013

#### Introduction

Clinical handover or handoff is defined as the transfer of professional responsibility and accountability for some or all aspects of care for a patient or group of patients, to another person or professional group on a temporary or permanent basis. It can take place, for example, at nursing shift change.

Clinical handover is a procedure used universally by nurses to promote care continuum. Misunderstandings, breakdowns, and other failures in this communication happen. They can lead to severe consequences, including, preventable sentinel and adverse events. Verbal clinical handover typically provides an accurate representation of a given patient's background and current state of clinical management. However, over two thirds of this valuable verbal information is lost after five consecutive shifts if handover notes are taken by hand. If no notes are taken, all verbal information is lost after three shifts.

NICTA is developing technology to improve clinical handover communication by taking handover notes semi-automatically. First, verbal clinical handover is converted to a free-text document using SR. Second, a structured form is filled with text snippets extracted from the free-text document using IE. This automation provides a systematic approach of incorporating a document draft to computerized medical records systems after its manual clinical review and editing.

#### Task 1: Creating Free-Text Documents

The first task consists of creating 100 documents describing realistic but imaginary verbal handovers. Please imagine that you are working as yourself in a medical ward and are delivering verbal handovers to another nurse at nursing shift change by your patient's bedside. Please assume that you are NOT discussing with another nurse but rather having a monologue that includes all handover information at once. Please write a text document (a txt file) that captures this handover one file per one patient and all text as one paragraph. Please write as if you were talking and use words and phrases that you would normally use. Each document should be from 100 to 300 words. Please spend 5-15 minutes to imagine and type each scenario. An example document is shown below as well as some further requirements for the patient cases.

We want 100 unique patients (i.e., only one document per patient). Some patients should have been just admitted to the ward, some should have been there for some days already and some should be almost ready to be discharged. Some patient should have a short inpatient period and some longer. Reasons for admission should be acute conditions, but some patients should have chronic diseases too. To create a balanced dataset, we wish to have only adult patients (but both young and old), including respiratory, cardiovascular, renal, and neurological conditions, 25 patients per each condition category.

You can assume that both you and the other nurse know some patients quite well already whilst you and/or the other nurse are not so familiar with other patient cases. Please use navigate to the folder Profiles/100profiles to see the pre-set profiles of the 100 cases (1.doc, 2.doc, 3.doc, ... , 100.doc). After familiarizing yourself with a profile, please open the respective txt file (1.txt, 2.txt, 3.txt, ... , 100.txt) and write your 100-300-word document there. Please remember to save your txt files.

**Example document:** *Bed eight, Michael I Wu. Forty-eight years under Dr Hanlen. He came in with headache and vertigo. He's got a history of headache, tinnitus, Bell's Palsy to the left side of his face. That's where his headache has been for the last three years. He's also got photophobia. His GCS is 15 pupils equal and reactive. He's just came back from a brain MRI in Woden. He's ambulant and self-caring but he's a little bit unsteady at times. OBS are stable. He is for carotid doppler, he was supposed to have this morning at 950 but that pushed it back to 1050. Hmmm. 1030, sorry. Because they were late. Then the team were here and they said it's cutting it too close to his MRI so he needs another carotid doppler appointment. Other than that Mike is fine.*

**End-result:** 1.txt, 2.txt, 3.txt, ... , 100.txt

**Estimated time:** 5-15 min per document. 8-25 h in total, preferably around 15 h

## Task 2: Marking the Text Snippets for Form Filling

An example form is given below. Note that not all documents will include all information specified in the form (i.e., some slots will not be filled in with text snippets). Further, some documents have relevant information to a given heading multiple times (e.g., the patient's given name of Michael and Mike or two care team members).

Please use Protégé Knowtator as guided and practiced in our training session to mark the snippets of text relevant to each subheading (see an example highlighting below). The program has been installed on your computer. Please proceed a document by document until you have marked all classes for all documents.

**End-result:** annotated.pins, annotated.pons, and annotated.pprj files that capture all markings (all subheadings for all documents)

**Estimated time:** 15-30 min per document. 25-50 h in total, preferably around 35 h

### Task 3: Creating Speech-Recognized Free-Text Records

In this task, you will speak all 100 documents of the task 1 out loud as naturally as you can at NICTA. First, we will record what you said using a digital voice recorder and microphone in order to be able to repeat the experiments in the future. The use of the recorder and microphone will be practiced before the actual recording and you can always record a document again if you are not happy with the way you sound. Second, when you are happy with all your document recordings, we will initialize SR software together with you and then use it to convert your audio files to text.

**End-result:** 1.wma, 2.wma, 3.wma, ... , 100.wma and the respective Dragon outputs

**Estimated time:** 5-10 min per document. 8-16 h in total, preferably around 12 h

## Example form:

### Handover Nurse

|                      |         |
|----------------------|---------|
| Title                | RN      |
| Given names/initials | L Jamie |
| Last name            | Hanlen  |
| Allocated rooms      | 2       |
| Allocated beds       | 1-8     |

### Patient Introduction

|                            |                                       |      |
|----------------------------|---------------------------------------|------|
| Title                      |                                       |      |
| Given names/initials       |                                       |      |
| Last name                  |                                       |      |
| ID number                  | medical record number 183664830183883 |      |
| Date of birth              | DOB year                              | 1981 |
|                            | DOB month                             | 11   |
|                            | DOB day                               | 11   |
| Age in years               | 31                                    |      |
| Gender                     | He                                    |      |
| Current room               | 3                                     |      |
| Current bed                | 1                                     |      |
| Under Dr                   | Given names/initials                  |      |
|                            | Last name                             |      |
| Admission reason/diagnosis | came in with SOB                      |      |
| Allergy                    | penicillin                            |      |
| Chronic condition          | DM type 2                             |      |
| Disease/problem history    |                                       |      |
| Care plan                  |                                       |      |

### My Shift

|                                |  |
|--------------------------------|--|
| Status                         |  |
| Contraction                    |  |
| Input/diet                     |  |
| Output/diuresis/bowel movement |  |
| Wounds/skin                    |  |
| Activities of daily living     |  |
| Risk management                |  |
| Other observation              |  |

### Appointment/procedure

|               |                      |  |
|---------------|----------------------|--|
| Status        | planned              |  |
| Description   | MRI scan             |  |
| Clinician     | Title                |  |
|               | Given names/initials |  |
|               | Last name            |  |
| Date and time | Year                 |  |
|               | Month                |  |
|               | Day                  |  |
|               | Time                 |  |
| Place         | City                 |  |
|               | Hospital             |  |
|               | Ward                 |  |

### Medication

|          |                       |
|----------|-----------------------|
| Medicine | sliding scale insulin |
| Dosage   |                       |
| Status   | started 5 years ago   |

### Future Care

|                                            |              |
|--------------------------------------------|--------------|
| Alert/warning/abnormal result              | may be MRSA+ |
| Goal/task to be completed/expected outcome |              |
| Discharge/transfer plan                    |              |

# Example highlighting:

The screenshot displays the Protégé software interface with a text source open. The text source is titled "text source: 0.txt" and contains a paragraph of medical text. Several phrases in the text are highlighted in yellow, indicating they have been annotated. The highlighted text includes: "Bed eight, Michael (M). Forty-eight years under Dr Harlen. He came in with headache and vertigo. He's got a history of headache, tinnitus, Bell's Palsy to the left side of his face. That's where his headache has been for the last three years. He's also got photophobia. His GCS is 15 pupils equal and reactive. He's just came back from a brain MRI in Widen. He's ambulant and self-caring but he's a little bit unsteady at times. OBS are stable. He is for carotid doppler, he was supposed to have this morning at 950 but that pushed it back to 1050. Hmm. 1030, sorry. Because they were late. Then the team were here and they said it's cutting it too close to his MRI so he needs another carotid doppler appointment. Other than that Mike is fine."

The left sidebar shows the "annotation schema" with a list of classes. The class "MyShift\_OtherObservation (1)" is selected and highlighted in pink. The right sidebar shows the details for the selected annotation. It includes a "span edit" section with navigation buttons and "clear" and "delete" buttons. Below that, the "annotated class" is listed as "MyShift\_OtherObservation (1)". The "slots of annotated class (0 values)" section is empty. The "annotator" section shows "Marcel Angel, RN" and the "creation date" as "d Jan 30 17:08:42 EST 2013". The "comments on this annotation" section is empty, and the "spans" section shows "718746". The "annotation set membership" section is also empty.
